# Supplementary material
Source: PubMed Central journal article supplement (PMC3323012)

## Supplemental data for

Title: Stabilization of RNT-1, the RUNX homolog of *Caenorhabditis elegans*, by oxidative stress through a MAP kinase pathway

Authors: Kiho Lee<sup>1</sup>, Jiwon Shim<sup>1</sup>, Jaebum Bae<sup>2</sup>, Young-Joon Kim<sup>2</sup> and Junho Lee<sup>1</sup>\*

<sup>1</sup>From Research Center for Cellulomics, Department of Biological Sciences, WCU Department of Biophysics and Chemical Biology, Seoul National University, Seoul, 151-742, South Korea

<sup>2</sup>Department of Biochemistry, College of Life Science and Technology, Yonsei University, Seoul 120-749, South Korea

**Supplemental Table 1.** Primers used in this study

| Purpose                                                                 | Name             | Sequence                                     |
|-------------------------------------------------------------------------|------------------|----------------------------------------------|
| To detect mRNA of <i>rnt-1</i> by <i>in situ</i> hybridization          | rnt-1 in situ -1 | TTTGACAATCGTTATACATTTGGCG<br>CCGATGATGGTGGCC |
| To detect mRNA of <i>rnt-1</i> by <i>in situ</i> hybridization          | rnt-1 in situ -2 | GGCCACCATCATCGGCGCCGAATG<br>TATAACGATTGTCAA  |
| To detect mRNA level of <i>rnt-1</i> by qPCR                            | rnt-1 Q -1       | GACCAAGGGATGCGAGAATA                         |
| To detect mRNA level of <i>rnt-1</i> by qPCR                            | rnt-1 Q -2       | GAAGGATGTGGTCCTGGAGA                         |
| To clone <i>pmk-1</i> into L4440 vector for RNAi                        | pmk-1 C -1       | AACCATGGATGTTTCCACAGACAA<br>CAATG            |
| To clone <i>pmk-1</i> into L4440 vector for RNAi                        | pmk-1 C -2       | AAAGTCGACCTACGATTCCATTTTC<br>TCCT            |
| To clone <i>pmk-1</i> into pcDNA3.1 for expressing in HEK293T cell line | pmk-1 flag-1     | AGGATCCATGTTTCCACAGACAAC<br>AATGGA           |
| To clone <i>pmk-1</i> into pcDNA3.1 for expressing in HEK293T cell line | pmk-1 flag-2     | AAACTCGAGCGATTCCATTTTCTCC<br>TCATC           |
| To clone <i>sek-1</i> into pcDNA3.1 for expressing in HEK293T cell line | sek-1 ha-1       | AGGATCCATGGAGCGAAAAGGACG<br>TGAG             |
| To clone <i>sek-1</i> into pcDNA3.1 for expressing in HEK293T cell line | sek-1 ha-2       | AAACTCGAGTCGTCGCCAAACAGT<br>GTCG             |
| To clone <i>sek-1</i> into pcDNA3.1 for expressing in HEK293T cell line | rnt-flag-1       | ATGACCAACGTCTTCCATCAC                        |
| To clone <i>sek-1</i> into pcDNA3.1 for expressing in HEK293T cell line | rnt-flag-2       | AAAAGGCCTCCAAATAGTCGG                        |
| To express GST-fused <i>rnt-1</i> in <i>E. coli</i>                     | rnt-S200-1       | AGGATCCATGACCAACGTCTTCCAT<br>CAC             |
| To express GST-fused <i>rnt-1</i> in <i>E. coli</i>                     | rnt-S200-2       | AAACTCGAGAGAAGGATGTGGTCC<br>TGGAGA           |
| To express GST-fused <i>rnt-1</i>                                       | rnt-S250-1       | AGGATCCATCTCAGCTGCACTTTGG                    |

|                                                       |                   |                                                                   |
|-------------------------------------------------------|-------------------|-------------------------------------------------------------------|
| in <i>E. coli</i>                                     |                   | AAA                                                               |
| To express GST-fused <i>rnt-1</i> in <i>E. coli</i>   | rnt-S250-2        | AAACTCGAGTAACTTCGGATCATC<br>AGAAGT                                |
| To express GST-fused <i>rnt-1</i> in <i>E. coli</i>   | rnt-S301-1        | AGGATCCAAACGACCATCTTCTCCT<br>CGT                                  |
| To express GST-fused <i>rnt-1</i> in <i>E. coli</i>   | rnt-S301-2        | AAACTCGAGAAAAGGCCTCCAAAT<br>AGTCGG                                |
| To mutate RNT-1 threonine serine 215 to alanine       | RNT-1<br>T215A-1  | CAC AGC GAA TCG ATG AAA GCT<br>CCG ATT AAA CAA AAA GTT GAA<br>CAG |
| To mutate RNT-1 threonine serine 215 to alanine       | RNT-1<br>T215A-1  | CTG TTC AAC TTT TTG TTT AAT<br>CGG AGC TTT CAT CGA TTC GCT<br>GTG |
| To mutate RNT-1 threonine serine 215 to alanine       | RNT-1<br>T236A-1  | GTA TCC CTT AAT ACG TCT GCA<br>TGC CTA TCA TCT                    |
| To mutate RNT-1 threonine serine 215 to alanine       | RNT-1<br>T236A-2  | AGA TGA TAG GCA TGC AGA CGT<br>ATT AAG GGA TAC                    |
| To mutate RNT-1 threonine serine 215 to alanine       | RNT-1 S242A<br>-1 | TGC CTA TCA TCT CCA GCA ATT<br>TTT ATA ACT CCA ACT TCT GAT        |
| To mutate RNT-1 threonine serine 215 to alanine       | RNT-1<br>S242A-2  | ATC AGA AGT TGG AGT TAT AAA<br>AAT TGC TGG AGA TGA TAG GCA        |
| To mutate RNT-1 threonine serine 215 to alanine       | RNT-1 S255A<br>-1 | AAA CGA CCA TCT GCT CCT CGT<br>TCA ATC ACA AAA TCA                |
| To mutate RNT-1 threonine serine 215 to alanine       | RNT-1<br>S255A-2  | TGA TTT TGT GAT TGA ACG AGG<br>AGC AGA TGG TCG TTT                |
| To mutate RNT-1 threonine serine 215 to alanine       | RNT-1 T273A<br>-1 | TTA ATT CAA GAA GCT CCG GAA<br>TCT GTA GAA TCA AAA AGA CGA        |
| To mutate RNT-1 threonine serine 215 to alanine       | RNT-1<br>T273A-2  | TCG TCT TTT TGA TTC TAC AGA<br>TTC CGG AGC TTC TTG AAT TAA        |
| To mutate RNT-1 threonine serine 215 to alanine       | RNT-1 S294A<br>-1 | ACT TCA TCG AAT AGT TCT GCT<br>CCG ACT ATT TGG AGG                |
| To mutate RNT-1 threonine serine 215 to alanine       | RNT-1<br>S294A-2  | CCT CCA AAT AGT CGG AGC AGA<br>ACT ATT CGA TGA AGT                |
| To detect DNA level of <i>vhp-1</i> promoter region A | vhp-1 A Q -1      | GGGGATCATTCCATTTTCCT                                              |
| To detect DNA level of <i>vhp-1</i> promoter region A | vhp-1 A Q -2      | CCTGTTTGCATCCAGGATCT                                              |
| To detect DNA level of <i>vhp-1</i> promoter region B | vhp-1 B Q -1      | TTGCCGTATTTTCTCTCATTCA                                            |
| To detect DNA level of <i>vhp-1</i> promoter region B | vhp-1 B Q -2      | GAAGACCTCGGCCATCTGTA                                              |
| To detect DNA level of <i>vhp-1</i> promoter region C | vhp-1 C Q -1      | TAATCCTGGGTTCCCATCCT                                              |
| To detect DNA level of <i>vhp-1</i> promoter region C | vhp-1 C Q -2      | GGATTTGCTTCTCGGAAGTG                                              |
| To detect DNA level of <i>vhp-1</i> promoter region D | vhp-1 D Q -1      | ACCTACCTGCCTGCCTACCT                                              |
| To detect DNA level of <i>vhp-1</i> promoter region D | vhp-1 D Q -2      | AACCACTTACGTGCCTACGG                                              |
| To detect mRNA level of <i>vhp-1</i> by qPCR          | vhp-1 Q -1        | CTTCGATCTCGCCAAACTTC                                              |
| To detect mRNA level of <i>vhp-1</i> by qPCR          | vhp-1 Q -2        | TGGATGATGCACTTTTTGGA                                              |

**Supplemental Table 2.** A list of candidate genes from ChiP-seq experiments

| Gene            | Description                                                                           | RNT-1 binding sequence | References                                |
|-----------------|---------------------------------------------------------------------------------------|------------------------|-------------------------------------------|
| <i>vhp-1</i>    | MAP kinase phosphatase                                                                | -9737, -9731           | Mizuno, T. <i>et al.</i> (1)              |
| <i>tir-1</i>    | ortholog of the human TIR domain-containing protein SARM                              | -5979, -5967           | Liberati, N.T. <i>et al.</i> (2)          |
| <i>nas-15</i>   | astacin-like metalloprotease                                                          | -1195, -1066           | Mohrlen, F., Hutter, H. & Zwillig, R. (3) |
| <i>nhr-274</i>  | nuclear hormone receptor family                                                       | -4547, -4439           | Okkema, P.(4)                             |
| <i>clec-151</i> | C-type LECTin                                                                         | -3921, -3914           | Wormbase                                  |
| <i>tag-260</i>  | Predicted E3 ubiquitin ligase                                                         | -2567, -2301           | Wormbase                                  |
| <i>eat-20</i>   | Fibrillins and related proteins containing Ca <sup>2+</sup> -binding EGF-like domains | -4698, -4475           | Shibata <i>et al.</i> , (5)               |
| <i>ell-1</i>    | RNA polymerase II elongation factor                                                   | -581, -291             | Wormbase                                  |
| <i>mvk-1</i>    | Mevalonate kinase                                                                     | 504, 597               | Wormbase(Kuwabara PE, O'Neil N)           |

#### Supplemental references

1. Mizuno, T., Hisamoto, N., Terada, T., Kondo, T., Adachi, M., Nishida, E., Kim, D. H., Ausubel, F. M., and Matsumoto, K. (2004) *The EMBO journal* **23**, 2226-2234
2. Liberati, N. T., Fitzgerald, K. A., Kim, D. H., Feinbaum, R., Golenbock, D. T., and Ausubel, F. M. (2004) *Proceedings of the National Academy of Sciences of the United States of America* **101**, 6593-6598
3. Mohrlen, F., Hutter, H., and Zwillig, R. (2003) *European journal of biochemistry / FEBS* **270**, 4909-4920
4. Okkema, P. (2005) *WormBook*
5. Shibata, Y., Fujii, T., Dent, J. A., Fujisawa, H., and Takagi, S. (2000) *Genetics* **154**, 635-646

## Supplemental figures

**Supplemental figure 1.** Stabilization of RNT-1 in worms after the MG132 treatment. The photo shows the anti-GFP western blot data using the N2; Ex[GFP::RNT-1] worm lysate. Same amounts of the worm lysates were used as confirmed by the actin western analysis.

**Supplemental figure 2.** Transcription level of *rnt-1* in the oxidative stress condition. The mRNA level of *rnt-1* was detected by quantitative PCR at each time point with 0.1 M paraquat treatment.

**Supplemental figure 3.** *rnt-1* mutants alleles show defects in oxidative stress response. The defects were rescued by RNT-1 expression under its own promoter or under an intestine-specific promoter, *act-5*, in the *rnt-1(ok351)* background.

**Supplemental figure 4.** Partial involvement of *kgb-1* and *mek-1* in the stabilization of RNT-1. RNAi of *kgb-1* and *mek-1* partially decreased the stabilization of RNT-1.

**Supplemental figure 5.** (A) The amino acid sequence of RNT-1. The red underline represents the conserved MAPK target sequence, Pro-X-Ser/Thr-Pro in RNT-1. The blue underlines represent the minimal MAPK target sequences in 201 to 250 amino acids of RNT-1. (B) Kinase assay of 201 to 250 amino acids of RNT-1 and mutations of putative MAPK target sequences in 201 to 250 amino acids of RNT-1.

**Supplemental figure 6.** Additional survival experiments of *vhp-1* RNAi in wild type N2 and *rnt-1(tm491)* animals in the 0.1 M paraquat background.

Lee *et al.*, Supplemental Figure 1

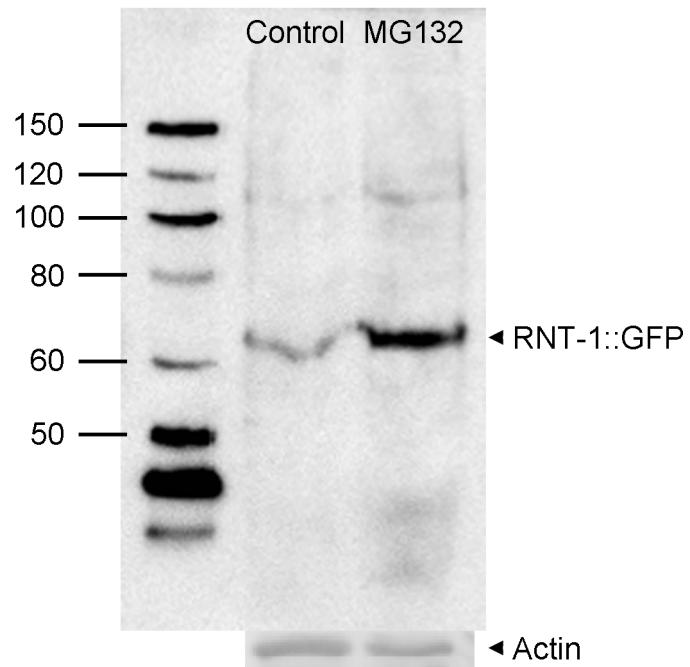

Lee *et al.*, Supplemental Figure 2

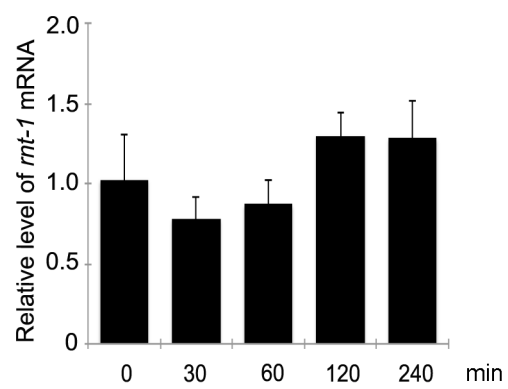

Lee *et al.*, Supplemental Figure 3

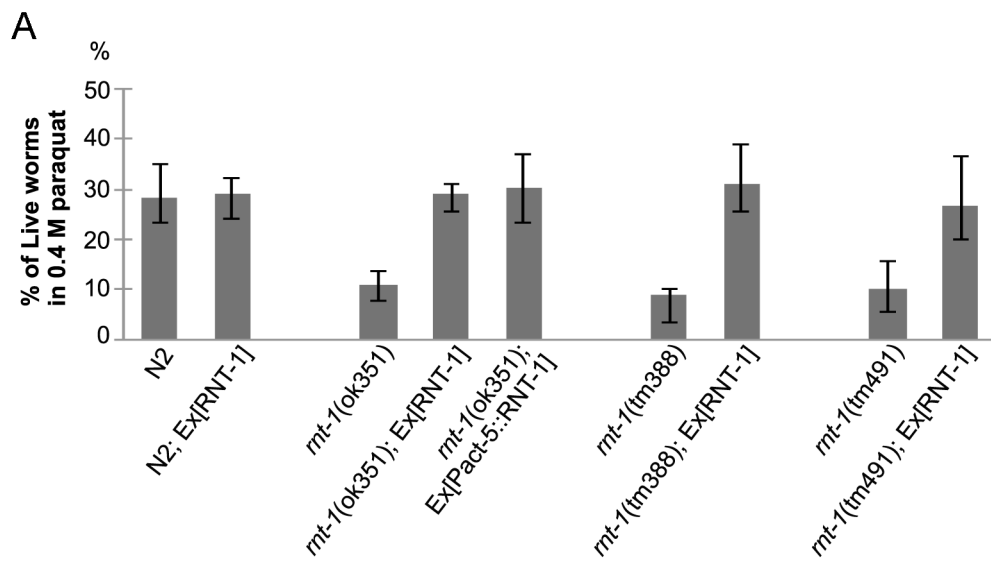

Lee *et al.*, Supplemental Figure 4

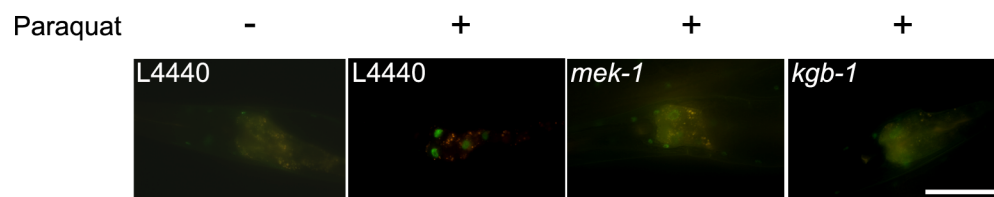



Lee *et al.*, Supplemental Figure 5

**A**

```

ceRNT-1  MTNVFHHVRN  F I E Q Q P A P A K  T L E K S S S P N I  L Y T A L P K H W R  S N K S F Q E P F Y
              60              20              40
ceRNT-1  V V L L T P V P D N  T E V S I W A G N D  E K P C E E V R N E  K A K V H R Q V A K  F N D L R F V G R S
              60              80              100
ceRNT-1  G R G R K F H L T I  V I H S A P M M V A  T V K N V I K V T V  D G P R D A R I P K  P Q G S L K R Q A E
              120              140              160
ceRNT-1  Q Q T I F P N D I I  R T P G P P M P M T  M I P P P W F P L P  M T Q T F P P S F F  P L I S P G P H P S
              160              180              200
ceRNT-1  I S A A L W K I H S  E S M K T P I K Q K  V E Q E N V S L N T  S T C L S S P S I F  I T P T S D D R K L
              220              240              260
ceRNT-1  K R P S S P R S I T  K S S E T S I N L I  Q E T P E S V E S K  R R R N V S I T S S  N S S S P T I W R P
              260              280              300

ceRNT-1  F *
    
```

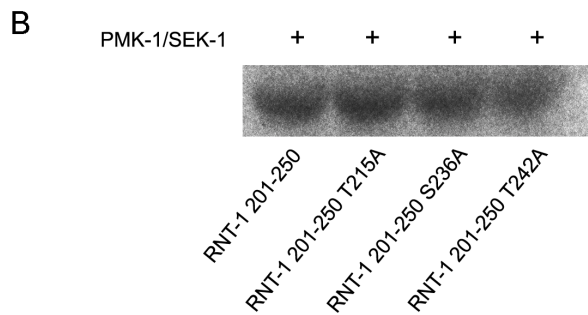

Lee *et al.*, Supplemental Figure 6

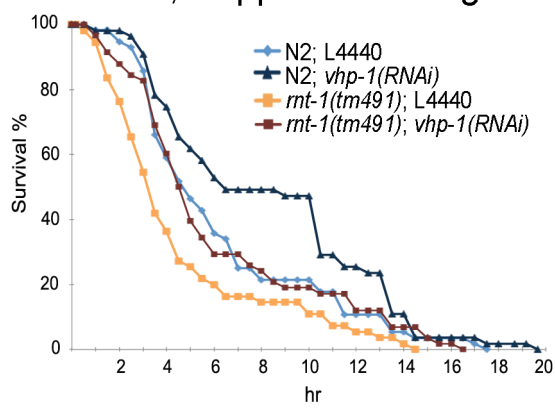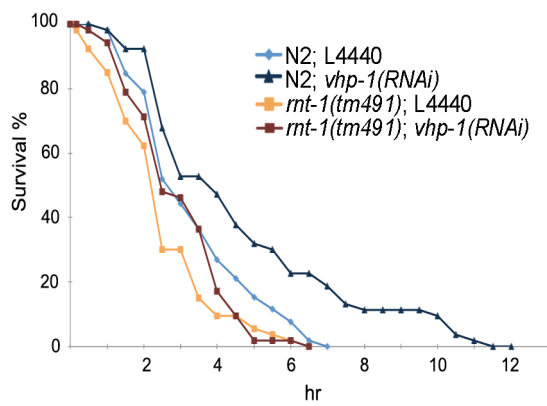

Supplement: supp_M111.314146_jbc.M111.314146-1.pdf [file supp_M111.314146_jbc.M111.314146-1.pdf]
